# Supplementary material
Source: Research Square preprint supplement (doi:10.21203/rs.3.rs-8679770/v1)
Supplement: Supplementary file 1 [file f3f723b3787b683078cff221.pdf]

Date:

Name:

Personal identification number:

---

**1a) Do you feel that the goal of BA was achieved?**

Circle your answer on a scale from 1–10, where 1 = not at all and 10 = completely agree.

1 2 3 4 5 6 7 8 9 10

Do you have any suggestions for improvement?

---

---

---

**2) For how many inpatient days did you use BA?**

1 day    2 days    3 days

---

**3) Did you carry out the activities that were planned in the agreement?**

Yes    No

If you answered no, what was the reason? Please also state if you missed any activities.

---

---

---

---

**4) What do you feel helped you the most in improving your mental health during BA?**

---

---

---

---

**5) How did you find managing your own medication on the ward?**

---

---

**6) What did you think of the BA room on the ward?**

---

---

---

---

**7) Did you have conversations with the staff on the ward?**

Yes    No

How did you experience this?

---

---

---

**8) Are you satisfied with the staff's approach and treatment in connection with BA?**

Circle your answer on a scale from 1–10, where 1 = not at all and 10 = completely agree.

1 2 3 4 5 6 7 8 9 10

What worked well in the staff's approach and treatment, and what could have been improved?

---

---

---

---

**9) Do you feel better today than when you were admitted for BA?**

Yes    No

What influenced your answer?

---

---

---

**10) Overall, are you satisfied with the BA admission?**

Circle your answer on a scale from 1–10, where 1 = not at all and 10 = completely agree.

1 2 3 4 5 6 7 8 9 10

---

**Thank you for your responses.**
